# Supplementary material
Source: publisher figshare collection journal article supplement (https://tandf.figshare.com/ndownloader/files/14331023)

Supplemental figure 1

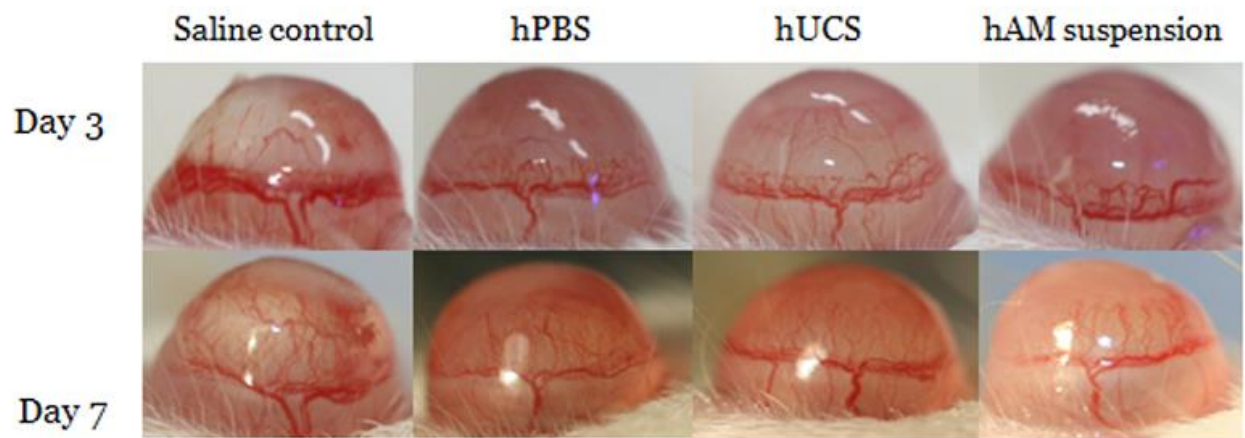

Supplement: Supplementary file 1 [file 14331023]
